# Supplementary material
Source: publisher figshare collection journal article supplement (https://wiley.figshare.com/articles/dataset/_/3511484)
Supplement: Supplementary file 1 [file 1]

Appendix A. summary of estimated population size, parameter estimates, risk of extinction and 90% decline in abundance and needed improvements in lambda to achieve lambda = 1 and to reduce risk of decline or extinction in 50 years to below 5%, assuming that hatchery fish and wild fish reproduce at equal rates. Only estimates for stocks and ESUs that had estimates of the hatchery proportion are shown. Estimates are provided for individual stocks and ESUs (in bold).

| ESU                              | Stock                  | Population Estimate (TS <sub>0</sub> ) | Population Parameter Estimates |                |                           |              |              |           | Risk of Extinction  |                        |           | Risk of 90% Decline |                        |           | Notes <sup>3</sup> |
|----------------------------------|------------------------|----------------------------------------|--------------------------------|----------------|---------------------------|--------------|--------------|-----------|---------------------|------------------------|-----------|---------------------|------------------------|-----------|--------------------|
|                                  |                        |                                        | μ                              | σ <sup>2</sup> | λ (95% CI)                | Prob λ < 1.0 | Prob λ < 0.9 | Req % Inc | 50 years (95% CI)   | Prob VHER <sup>1</sup> | Req % Inc | 50 years (95% CI)   | Prob VHRD <sup>2</sup> | Req % Inc |                    |
| <b>Lower Columbia R. chinook</b> | Abernathy Cr fall-tule | 3968                                   | -0.27                          | 0.02           | 0.76 (0.65 - 0.89)        | 0.94         | 0.88         | 32        | 1 (0.48 - 1)        | 0.88                   | 16        | 1 (1 - 1)           | 0.96                   | 31        |                    |
|                                  | Coweman R fall-tule    | 2923                                   | 0.23                           | 0.19           | 1.26 (0.84 - 1.90)        | 0.14         | 0.07         | 0         | 0 (0 - 0.12)        | 0.09                   | 0         | 0 (0 - 0.64)        | 0.18                   | 0         |                    |
|                                  | Lewis R fall-bright    | 37665                                  | -0.04                          | 0.05           | 0.96 (0.78 - 1.18)        | 0.62         | 0.29         | 4         | 0 (0 - 0.36)        | 0.18                   | 0         | 0.43 (0 - 1)        | 0.62                   | 5         |                    |
|                                  | Lewis EF fall-tule     | 853                                    | -0.01                          | 0.02           | 0.99 (0.85 - 1.14)        | 0.53         | 0.18         | 1         | 0 (0 - 0.27)        | 0.21                   | 0         | 0.06 (0 - 1)        | 0.48                   | 1         |                    |
|                                  | Sandy R fall-late      | 3907                                   | 0.00                           | 0.02           | 1 (0.83 - 1.19)           | 0.50         | 0.22         | 0         | 0 (0 - 0.02)        | 0.21                   | 0         | 0.02 (0 - 1)        | 0.48                   | 0         |                    |
|                                  | Sandy R fall-tule      | 410                                    | -0.22                          | 0.10           | 0.81 (0.24 - 2.67)        | 0.75         | 0.62         | 23        | 0.99 (0 - 1)        | 0.70                   | 19        | 1 (0 - 1)           | 0.79                   | 28        |                    |
| <b>Upper Columbia R. chinook</b> | <b>ESU Level</b>       | <b>4037</b>                            | <b>-0.18</b>                   | <b>0.13</b>    | <b>0.84 (0.61 - 1.15)</b> | <b>0.97</b>  | <b>0.78</b>  | <b>19</b> | <b>0.66 (0 - 1)</b> | <b>0.80</b>            | <b>12</b> | <b>1 (0 - 1)</b>    | <b>0.88</b>            | <b>25</b> | t, d               |
|                                  | Entiat R spr           | 188                                    | -0.22                          | 0.05           | 0.8 (0.66 - 0.98)         | 0.92         | 0.81         | 25        | 1 (0.08 - 1)        | 0.89                   | 19        | 1 (0.84 - 1)        | 0.94                   | 26        | d                  |
|                                  | Methow R spr           | 591                                    | -0.17                          | 0.28           | 0.85 (0.54 - 1.33)        | 0.78         | 0.61         | 18        | 0.79 (0 - 1)        | 0.70                   | 18        | 0.95 (0 - 1)        | 0.83                   | 28        | t, d               |
|                                  | Wenatchee R spr        | 1798                                   | -0.18                          | 0.09           | 0.83 (0.65 - 1.07)        | 0.87         | 0.71         | 20        | 0.82 (0 - 1)        | 0.72                   | 11        | 1 (0.05 - 1)        | 0.89                   | 23        | t, d               |
| <b>Snake R spr/sum chinook</b>   | <b>ESU Level</b>       | <b>69049</b>                           | <b>-0.22</b>                   | <b>0.07</b>    | <b>0.81 (0.65 - 1.01)</b> | <b>1.00</b>  | <b>0.94</b>  | <b>23</b> | <b>0.46 (0 - 1)</b> | <b>0.73</b>            | <b>7</b>  | <b>1 (0.56 - 1)</b> | <b>0.93</b>            | <b>27</b> |                    |
|                                  | Bear Valley/Elk Cr     | 713                                    | 0.03                           | 0.16           | 1.03 (0.75 - 1.42)        | 0.41         | 0.20         | 0         | 0.01 (0 - 0.95)     | 0.27                   | 0         | 0.09 (0 - 1)        | 0.46                   | 2         |                    |
|                                  | Big Sheep Cr spr       | NA                                     | -0.15                          | 0.88           | 0.86 (0.43 - 1.72)        | 0.71         | 0.55         | 16        | NA                  | NA                     | NA        | 0.79 (0 - 1)        | 0.79                   | 39        |                    |
|                                  | Camas Cr spr           | NA                                     | -0.14                          | 0.12           | 0.87 (0.63 - 1.20)        | 0.78         | 0.58         | 15        | NA                  | NA                     | NA        | 0.97 (0 - 1)        | 0.82                   | 20        |                    |
|                                  | Cape Horn Cr spr       | NA                                     | 0.02                           | 0.22           | 1.02 (0.66 - 1.58)        | 0.45         | 0.25         | 0         | NA                  | NA                     | NA        | 0.16 (0 - 1)        | 0.51                   | 5         | d                  |
|                                  | Imnaha R spr           | 1092                                   | -0.12                          | 0.05           | 0.89 (0.75 - 1.06)        | 0.84         | 0.55         | 12        | 0.28 (0 - 1)        | 0.56                   | 3         | 0.99 (0.01 - 1)     | 0.83                   | 14        |                    |
|                                  | Johnson Cr sum         | 432                                    | 0.01                           | 0.05           | 1.01 (0.84 - 1.21)        | 0.45         | 0.17         | 0         | 0 (0 - 0.55)        | 0.23                   | 0         | 0.05 (0 - 1)        | 0.44                   | 0         |                    |
|                                  | Lookingglass Cr spr    | NA                                     | -0.47                          | 0.27           | 0.63 (0.43 - 0.92)        | 0.97         | 0.93         | 56        | NA                  | NA                     | NA        | 1 (0.98 - 1)        | 0.98                   | 73        | t                  |

| ESU                               | Stock                  | Population<br>Estimate<br>(TS <sub>0</sub> ) | Population Parameter Estimates |                |                           |                 |                 |              | Risk of Extinction   |                           |              | Risk of 90% Decline  |                           |              | Notes <sup>3</sup> |
|-----------------------------------|------------------------|----------------------------------------------|--------------------------------|----------------|---------------------------|-----------------|-----------------|--------------|----------------------|---------------------------|--------------|----------------------|---------------------------|--------------|--------------------|
|                                   |                        |                                              | μ                              | σ <sup>2</sup> | λ<br>(95% CI)             | Prob<br>λ < 1.0 | Prob<br>λ < 0.9 | Req %<br>Inc | 50 years<br>(95% CI) | Prob<br>VHER <sup>1</sup> | Req %<br>Inc | 50 years<br>(95% CI) | Prob<br>VHRD <sup>2</sup> | Req %<br>Inc |                    |
|                                   | Marsh Cr spr           | 286                                          | 0.01                           | 0.15           | 1.01 (0.74 - 1.37)        | 0.47            | 0.24            | 0            | 0.03 (0 - 0.99)      | 0.35                      | 0            | 0.17 (0 - 1)         | 0.51                      | 4            |                    |
|                                   | Minam R spr            | 554                                          | -0.07                          | 0.24           | 0.94 (0.63 - 1.39)        | 0.63            | 0.40            | 6            | 0.28 (0 - 1)         | 0.51                      | 6            | 0.61 (0 - 1)         | 0.69                      | 15           | t                  |
|                                   | Minam R Up spr         | NA                                           | -0.06                          | 0.09           | 0.94 (0.74 - 1.19)        | 0.67            | 0.35            | 6            | NA                   | NA                        | NA           | 0.63 (0 - 1)         | 0.69                      | 9            |                    |
|                                   | Poverty Cr             | 958                                          | 0.00                           | 0.10           | 1 (0.77 - 1.28)           | 0.50            | 0.23            | 0            | 0 (0 - 0.95)         | 0.28                      | 0            | 0.18 (0 - 1)         | 0.53                      | 4            |                    |
|                                   | Sulphur Cr spr         | 200                                          | 0.03                           | 0.47           | 1.03 (0.60 - 1.77)        | 0.43            | 0.26            | 0            | 0.17 (0 - 1)         | 0.43                      | 7            | 0.21 (0 - 1)         | 0.51                      | 9            |                    |
| <b>Snake R fall chinook</b>       | <b>ESU Level</b>       | <b>2600</b>                                  | <b>-0.12</b>                   | <b>0.02</b>    | <b>0.88 (0.76 - 1.03)</b> | <b>1.00</b>     | <b>0.67</b>     | <b>14</b>    | <b>0.04 (0 - 1)</b>  | <b>0.37</b>               | <b>0</b>     | <b>1 (0.05 - 1)</b>  | <b>0.85</b>               | <b>12</b>    |                    |
| <b>Upper Willamette R chinook</b> | <b>ESU Level</b>       | <b>36081</b>                                 | <b>-0.47</b>                   | <b>0.09</b>    | <b>0.62 (0.48 - 0.81)</b> | <b>1.00</b>     | <b>1.00</b>     | <b>61</b>    | <b>1 (0.93 - 1)</b>  | <b>1.00</b>               | <b>41</b>    | <b>1 (1 - 1)</b>     | <b>0.99</b>               | <b>65</b>    |                    |
|                                   | McKenzie R abv Leaburg | 8764                                         | -0.14                          | 0.24           | 0.87 (0.57 - 1.31)        | 0.76            | 0.57            | 15           | 0.36 (0 - 1)         | 0.54                      | 8            | 0.92 (0 - 1)         | 0.81                      | 24           |                    |
| <b>Columbia R chum</b>            | Grays R WF             | NA                                           | 0.21                           | 0.23           | 1.23 (0.82 - 1.85)        | 0.15            | 0.07            | 0            | NA                   | NA                        | NA           | 0 (0 - 0.74)         | 0.20                      | 0            |                    |
|                                   | Grays R mouth to head  | NA                                           | -0.03                          | 0.10           | 0.97 (0.74 - 1.27)        | 0.58            | 0.30            | 3            | NA                   | NA                        | NA           | 0.38 (0 - 1)         | 0.61                      | 7            |                    |
|                                   | Hardy Cr               | NA                                           | 0.04                           | 0.06           | 1.04 (0.86 - 1.25)        | 0.34            | 0.13            | 0            | NA                   | NA                        | NA           | 0.01 (0 - 0.93)      | 0.35                      | 0            |                    |
|                                   | Crazy J                | NA                                           | 0.14                           | 0.03           | 1.15 (0.99 - 1.33)        | 0.11            | 0.05            | 0            | NA                   | NA                        | NA           | 0 (0 - 0)            | 0.13                      | 0            |                    |
|                                   | Hamilton Cr            | NA                                           | -0.08                          | 0.05           | 0.92 (0.76 - 1.12)        | 0.74            | 0.40            | 9            | NA                   | NA                        | NA           | 0.86 (0 - 1)         | 0.75                      | 10           |                    |
|                                   | Hamilton springs       | NA                                           | 0.09                           | 0.51           | 1.1 (0.62 - 1.93)         | 0.33            | 0.19            | 0            | NA                   | NA                        | NA           | 0.1 (0 - 1)          | 0.41                      | 3            | t, a               |
| <b>Lower Columbia R steelhead</b> | <b>ESU Level</b>       | <b>NA</b>                                    | <b>-0.26</b>                   | <b>0.00</b>    | <b>0.77 (0.75 - 0.79)</b> | <b>1.00</b>     | <b>1.00</b>     | <b>30</b>    | <b>NA</b>            | <b>NA</b>                 | <b>NA</b>    | <b>1 (1 - 1)</b>     | <b>0.98</b>               | <b>25</b>    | I                  |
|                                   | Clackamas R sum        | 7185                                         | -0.33                          | 0.09           | 0.72 (0.57 - 0.92)        | 0.96            | 0.91            | 39           | 1 (0.19 - 1)         | 0.91                      | 25           | 1 (1 - 1)            | 0.97                      | 43           | t                  |
|                                   | Clackamas R win        | 3470                                         | -0.36                          | 0.06           | 0.69 (0.57 - 0.85)        | 0.97            | 0.93            | 45           | 1 (0.92 - 1)         | 0.94                      | 30           | 1 (1 - 1)            | 0.98                      | 46           | t                  |
|                                   | Green R win            | 450                                          | -0.15                          | 0.25           | 0.86 (0.24 - 3.08)        | 0.67            | 0.52            | 16           | 0.73 (0 - 1)         | 0.62                      | 39           | 0.93 (0 - 1)         | 0.73                      | 25           | t                  |

| ESU                               | Stock                | Population<br>Estimate<br>(TS <sub>0</sub> ) | Population Parameter Estimates |                |                    |                 |                 |              | Risk of Extinction   |                           |              | Risk of 90% Decline  |                           |              | Notes <sup>3</sup> |
|-----------------------------------|----------------------|----------------------------------------------|--------------------------------|----------------|--------------------|-----------------|-----------------|--------------|----------------------|---------------------------|--------------|----------------------|---------------------------|--------------|--------------------|
|                                   |                      |                                              | μ                              | σ <sup>2</sup> | λ<br>(95% CI)      | Prob<br>λ < 1.0 | Prob<br>λ < 0.9 | Req %<br>Inc | 50 years<br>(95% CI) | Prob<br>VHER <sup>1</sup> | Req %<br>Inc | 50 years<br>(95% CI) | Prob<br>VHRD <sup>2</sup> | Req %<br>Inc |                    |
| Middle<br>Columbia R<br>steelhead | Kalama R sum         | 18673                                        | -0.36                          | 0.07           | 0.7 (0.54 - 0.90)  | 0.95            | 0.91            | 43           | 1 (0.46 - 1)         | 0.89                      | 25           | 1 (1 - 1)            | 0.97                      | 46           | d                  |
|                                   | Kalama R win         | 6844                                         | -0.13                          | 0.01           | 0.87 (0.78 - 0.98) | 0.87            | 0.64            | 15           | 0 (0 - 0.99)         | 0.41                      | 0            | 1 (0.52 - 1)         | 0.88                      | 13           |                    |
|                                   | Lewis R EF win       | NA                                           | -0.17                          | 0.02           | 0.84 (0.59 - 1.21) | 0.76            | 0.61            | 19           | NA                   | NA                        | NA           | 1 (0 - 1)            | 0.79                      | 18           |                    |
|                                   | Sandy R win          | 8064                                         | -0.19                          | 0.03           | 0.83 (0.7 - 0.98)  | 0.90            | 0.77            | 20           | 0.64 (0 - 1)         | 0.66                      | 5            | 1 (0.79 - 1)         | 0.92                      | 21           |                    |
|                                   | Toutle R SF win      | NA                                           | -0.10                          | 0.00           | 0.91 (0.88 - 0.93) | 0.79            | 0.43            | 10           | NA                   | NA                        | NA           | 1 (1 - 1)            | 0.80                      | 6            | t                  |
|                                   | wind R sum           | 1218                                         | -0.06                          | 0.00           | 0.95 (0.83 - 1.08) | 0.65            | 0.33            | 5            | 0 (0 - 0.19)         | 0.34                      | 0            | 0.91 (0 - 1)         | 0.62                      | 3            |                    |
|                                   | ESU Level            | NA                                           | -0.11                          | 0.11           | 0.89 (0.68 - 1.18) | 0.90            | 0.54            | 12           | NA                   | NA                        | NA           | 0.92 (0 - 1)         | 0.80                      | 16           |                    |
|                                   | Beaver Cr NF sum     | NA                                           | -0.06                          | 0.17           | 0.95 (0.70 - 1.28) | 0.63            | 0.36            | 5            | NA                   | NA                        | NA           | 0.57 (0 - 1)         | 0.68                      | 12           |                    |
|                                   | Deschutes R sum      | 9751                                         | -0.16                          | 0.10           | 0.85 (0.67 - 1.07) | 0.86            | 0.67            | 18           | 0.38 (0 - 1)         | 0.58                      | 6            | 1 (0.09 - 1)         | 0.89                      | 22           |                    |
|                                   | Eightmile Cr win     | NA                                           | -0.08                          | 1.62           | 0.92 (0.17 - 4.96) | 0.57            | 0.43            | 9            | NA                   | NA                        | NA           | 0.57 (0 - 1)         | 0.66                      | 39           |                    |
|                                   | Fifteen Mile Cr win  | NA                                           | -0.01                          | 0.03           | 0.99 (0.82 - 1.18) | 0.54            | 0.22            | 1            | NA                   | NA                        | NA           | 0.11 (0 - 1)         | 0.52                      | 2            |                    |
|                                   | Mill Cr sum          | NA                                           | -0.03                          | 0.00           | 0.97 (0.92 - 1.03) | 0.69            | 0.17            | 3            | NA                   | NA                        | NA           | 0.02 (0 - 1)         | 0.50                      | 0            | l                  |
| Upper Columbia<br>R steelhead     | Ramsey Cr win        | NA                                           | 0.06                           | 1.65           | 1.06 (0.19 - 5.75) | 0.44            | 0.30            | 0            | NA                   | NA                        | NA           | 0.29 (0 - 1)         | 0.53                      | 22           |                    |
|                                   | Umatilla R sum       | 10062                                        | -0.04                          | 0.03           | 0.96 (0.85 - 1.10) | 0.65            | 0.21            | 4            | 0 (0 - 0.02)         | 0.14                      | 0            | 0.34 (0 - 1)         | 0.60                      | 4            | t, a, d            |
|                                   | Warm Springs Nfh sum | 729                                          | -0.06                          | 0.08           | 0.94 (0.75 - 1.18) | 0.67            | 0.35            | 6            | 0.06 (0 - 1)         | 0.41                      | 0            | 0.63 (0 - 1)         | 0.69                      | 9            |                    |
|                                   | ESU Level            | 8678                                         | -0.37                          | 0.11           | 0.69 (0.48 - 1)    | 1.00            | 0.99            | 45           | 1 (0.18 - 1)         | 0.99                      | 32           | 1 (0.92 - 1)         | 0.96                      | 50           |                    |
| Snake R<br>steelhead              | ESU Level            | 377945                                       | -0.32                          | 0.02           | 0.73 (0.66 - 0.8)  | 1.00            | 1.00            | 37           | 1 (0.37 - 1)         | 0.99                      | 10           | 1 (1 - 1)            | 0.99                      | 35           | t                  |
|                                   | Butte Cr sum A       | NA                                           | 0.06                           | 0.65           | 1.07 (0.59 - 1.94) | 0.39            | 0.23            | 0            | NA                   | NA                        | NA           | 0.17 (0 - 1)         | 0.47                      | 9            | a                  |

| ESU                                | Stock                | Population Estimate (TS <sub>0</sub> ) | Population Parameter Estimates |                |                    |                 |                 |              | Risk of Extinction   |                           |              | Risk of 90% Decline  |                           |              | Notes <sup>3</sup> |
|------------------------------------|----------------------|----------------------------------------|--------------------------------|----------------|--------------------|-----------------|-----------------|--------------|----------------------|---------------------------|--------------|----------------------|---------------------------|--------------|--------------------|
|                                    |                      |                                        | μ                              | σ <sup>2</sup> | λ<br>(95% CI)      | Prob<br>λ < 1.0 | Prob<br>λ < 0.9 | Req %<br>Inc | 50 years<br>(95% CI) | Prob<br>VHER <sup>1</sup> | Req %<br>Inc | 50 years<br>(95% CI) | Prob<br>VHRD <sup>2</sup> | Req %<br>Inc |                    |
| Upper<br>Willamette R<br>steelhead | Camp Cr sum A run    | NA                                     | -0.03                          | 0.21           | 0.97 (0.69 - 1.37) | 0.56            | 0.32            | 3            | NA                   | NA                        | NA           | 0.4 (0 - 1)          | 0.62                      | 10           |                    |
|                                    | Crow Cr sum A        | NA                                     | 0.03                           | 0.25           | 1.03 (0.71 - 1.49) | 0.42            | 0.22            | 0            | NA                   | NA                        | NA           | 0.15 (0 - 1)         | 0.49                      | 5            |                    |
|                                    | Devils Run Cr sum A  | NA                                     | 0.05                           | 0.25           | 1.05 (0.73 - 1.53) | 0.37            | 0.19            | 0            | NA                   | NA                        | NA           | 0.08 (0 - 1)         | 0.43                      | 2            | t                  |
|                                    | Fly Cr sum A         | NA                                     | -0.04                          | 0.27           | 0.97 (0.66 - 1.42) | 0.57            | 0.34            | 3            | NA                   | NA                        | NA           | 0.44 (0 - 1)         | 0.63                      | 12           | t                  |
|                                    | Mccoy Cr sum A       | NA                                     | 0.05                           | 0.08           | 1.05 (0.85 - 1.30) | 0.33            | 0.13            | 0            | NA                   | NA                        | NA           | 0.01 (0 - 0.98)      | 0.35                      | 0            |                    |
|                                    | Meadow Cr sum A      | NA                                     | -0.04                          | 0.12           | 0.96 (0.75 - 1.24) | 0.59            | 0.30            | 4            | NA                   | NA                        | NA           | 0.42 (0 - 1)         | 0.62                      | 8            |                    |
|                                    | Peavine Cr sum A     | NA                                     | 0.07                           | 0.29           | 1.07 (0.70 - 1.64) | 0.35            | 0.19            | 0            | NA                   | NA                        | NA           | 0.07 (0 - 1)         | 0.41                      | 2            |                    |
|                                    | Phillips Cr sum A    | NA                                     | -0.05                          | 0.09           | 0.95 (0.76 - 1.19) | 0.65            | 0.33            | 5            | NA                   | NA                        | NA           | 0.55 (0 - 1)         | 0.67                      | 9            |                    |
|                                    | Snake R A            | 333995                                 | -0.32                          | 0.01           | 0.73 (0.67 - 0.79) | 0.99            | 0.98            | 37           | 1 (0.63 - 1)         | 0.91                      | 9            | 1 (1 - 1)            | 0.99                      | 35           | t                  |
|                                    | Snake R B            | 86029                                  | -0.30                          | 0.04           | 0.74 (0.63 - 0.86) | 0.97            | 0.93            | 35           | 0.99 (0.04 - 1)      | 0.86                      | 14           | 1 (1 - 1)            | 0.98                      | 36           | t                  |
|                                    | Summit Cr sum A      | NA                                     | 0.03                           | 0.36           | 1.03 (0.66 - 1.60) | 0.43            | 0.24            | 0            | NA                   | NA                        | NA           | 0.19 (0 - 1)         | 0.50                      | 7            |                    |
|                                    | Swamp Cr sum A       | NA                                     | 0.01                           | 0.11           | 1.01 (0.79 - 1.30) | 0.45            | 0.20            | 0            | NA                   | NA                        | NA           | 0.11 (0 - 1)         | 0.48                      | 3            |                    |
|                                    | ESU Level            | 11340                                  | -0.15                          | 0.08           | 0.86 (0.65 - 1.13) | 0.97            | 0.71            | 16           | 0.2 (0 - 1)          | 0.56                      | 4            | 1 (0 - 1)            | 0.85                      | 19           |                    |
|                                    | Calapooia R late-win | 196                                    | -0.07                          | 0.21           | 0.93 (0.61 - 1.43) | 0.63            | 0.41            | 8            | 0.4 (0 - 1)          | 0.57                      | 21           | 0.64 (0 - 1)         | 0.68                      | 14           |                    |
| WA Coast<br>Chinook                | Mollala R late-win   | 754                                    | -0.29                          | 0.12           | 0.75 (0.58 - 0.96) | 0.95            | 0.87            | 33           | 1 (0.31 - 1)         | 0.91                      | 27           | 1 (0.79 - 1)         | 0.96                      | 39           |                    |
|                                    | N Santiam R late-win | 2524                                   | -0.16                          | 0.05           | 0.85 (0.72 - 1.01) | 0.90            | 0.71            | 18           | 0.61 (0 - 1)         | 0.67                      | 7            | 1 (0.27 - 1)         | 0.92                      | 19           | t                  |
|                                    | S Santiam R win      | 1061                                   | -0.08                          | 0.01           | 0.93 (0.85 - 1.01) | 0.86            | 0.31            | 8            | 0 (0 - 0.56)         | 0.26                      | 0            | 0.97 (0.01 - 1)      | 0.83                      | 7            | t                  |
|                                    | S Santiam R late-win | 1202                                   | -0.22                          | 0.09           | 0.8 (0.64 - 1)     | 0.92            | 0.81            | 25           | 0.98 (0.01 - 1)      | 0.84                      | 17           | 1 (0.53 - 1)         | 0.94                      | 28           |                    |
|                                    | Queets R fall        | 16334                                  | 0.03                           | 0.04           | 1.03 (0.79 - 1.36) | 0.39            | 0.20            | 0            | 0 (0 - 0.04)         | 0.17                      | 0            | 0 (0 - 1)            | 0.41                      | 0            | t                  |

<sup>1</sup> Very high extinction risk - probability that extinction in 50 years is over 25%.

| ESU | Stock | Population<br>Estimate<br>(TS <sub>0</sub> ) | Population Parameter Estimates |            |                       |                         |                         | Risk of Extinction |                      |                           | Risk of 90% Decline |                      |                           | Notes <sup>3</sup> |
|-----|-------|----------------------------------------------|--------------------------------|------------|-----------------------|-------------------------|-------------------------|--------------------|----------------------|---------------------------|---------------------|----------------------|---------------------------|--------------------|
|     |       |                                              | $\mu$                          | $\sigma^2$ | $\lambda$<br>(95% CI) | Prob<br>$\lambda < 1.0$ | Prob<br>$\lambda < 0.9$ | Req %<br>Inc       | 50 years<br>(95% CI) | Prob<br>VHER <sup>1</sup> | Req %<br>Inc        | 50 years<br>(95% CI) | Prob<br>VHRD <sup>2</sup> | Req %<br>Inc       |

<sup>2</sup> Very high risk of decline - probability that risk of 90% decline in 50 years is over 25%

<sup>3</sup> Tests for underlying assumptions were made on the running sums of wild spawner only counts where possible; otherwise total mixed counts were used. The codes designate tests that failed at (p<.05). Note that a number of the "fails" are false-fails since the p-value was not adjusted for multiple tests being conducted. If p value is adjusted (p<.001) to reduce the probability of a false positive to less than 5%, none of the time series fail the diagnostic tests.

- a. Significant 1st order autocorrelation in  $\ln(R_{t+1}/R_t)$  found.
- d. A model with depensatory density-dependence fit the data significantly better than model with no density-dependence. This indicates that the risk estimates are pessimistic.
- t. A model with a trend in  $\mu$  fit the data significantly better than the model with no trend. This indicates that the risk estimates are optimistic.
- l. The variance versus  $\tau$  plot showed significant non-linearity ( $R^2 < 0.7$ ) indicating an underestimate of  $\sigma^2$ .
